# Supplementary material for: The N-Glycosylation of Total Plasma Proteins and IgG in Atrial Fibrillation
Source: MDPI journal article supplement (doi:10.3390/biom13040605), 2023-03-28
Supplement: s1 [file s1]

**Supplementary material for**

# N-glycosylation of total plasma proteins and IgG in atrial fibrillation

Branimir Plavša<sup>1</sup>, Janko Szavits Nossan<sup>2</sup>, Aleksandar Blivajs<sup>3</sup>, Borna Rapčan<sup>1</sup>, Barbara Radovani<sup>4</sup>, Lovorka Đerek<sup>3</sup>, Diana Rudan<sup>3</sup>, Gordan Lauc<sup>1,5</sup>, Ivan Gudelj<sup>4,5</sup>

**Affiliations:**

1. Faculty of Pharmacy and Biochemistry, University of Zagreb, Zagreb, Croatia
2. Magdalena Clinic for Cardiovascular Disease, Krapinske Toplice, Croatia
3. Department of Cardiology, University Hospital Dubrava, Zagreb, Croatia
4. Department of Biotechnology, University of Rijeka, Rijeka, Croatia
5. Genos Glycoscience Research Laboratory, Zagreb, Croatia

**Table S1.** Formulas used for the calculation of derived traits for plasma and IgG.

| Derived trait                                                  | Formula                                                                                          |
|----------------------------------------------------------------|--------------------------------------------------------------------------------------------------|
| <b>Plasma</b>                                                  |                                                                                                  |
| Low branching (mono- and biantennary glycans) ( <b>LB</b> )    | GP1+GP2+GP3+GP4+GP5+GP6+GP8+GP9+GP10+GP11+GP12+GP13+GP14+GP15+GP16+GP17+GP18+GP20+GP21+GP22+GP23 |
| High branching (tri- and tetraantennary glycans) ( <b>HB</b> ) | GP24+GP25+GP26+GP27+GP28+GP29+GP30+GP31+GP32+GP33+GP34+GP35+GP36+GP37+GP38+GP39                  |
| Agalactosylation ( <b>G0</b> )                                 | GP1+0.5xGP2                                                                                      |
| Monogalactosylation ( <b>G1</b> )                              | GP3+GP4+GP5+GP6+GP13                                                                             |
| Digalactosylation ( <b>G2</b> )                                | GP8+GP9+GP10+GP11+0.5xGP12+GP14+GP15+GP16+GP17+GP18+GP20+GP21+GP22+GP23                          |
| Trigalactosylation ( <b>G3</b> )                               | GP24+GP25+GP26+GP27+GP28+GP29+GP30+GP31+GP32+GP33+GP34+GP35                                      |
| Tetragalactosylation ( <b>G4</b> )                             | GP36+GP37+GP38+GP39                                                                              |
| Neutral glycans ( <b>S0</b> )                                  | GP1+0.5xGP2+GP3+GP4+GP5+GP6+GP8+GP9+GP10+GP11                                                    |
| Monosialylation ( <b>S1</b> )                                  | 0.5xGP12+GP13+GP14+GP15+GP16+GP17                                                                |
| Disialylation ( <b>S2</b> )                                    | GP18+GP20+GP21+GP22+GP23+GP24+GP25+GP26+GP27                                                     |
| Trisialylation ( <b>S3</b> )                                   | GP28+GP29+GP30+GP31+GP32+GP33+GP34+GP35+GP36                                                     |
| Tetrasialylation ( <b>S4</b> )                                 | GP37+GP38+GP39                                                                                   |
| Bisecting GlcNAc ( <b>B</b> )                                  | 0.5xGP2+GP3+GP6+GP9+GP11+GP15+GP17+ GP23                                                         |
| Oligomannose glycans ( <b>M</b> )                              | 0.5xGP2+GP7+0.5xGP12+GP19                                                                        |
| Core fucosylation ( <b>CF</b> )                                | GP1+0.5xGP2+GP4+GP5+GP6+GP10+GP11+GP13+GP16+GP17+GP22+GP23+GP31+GP34+GP35                        |
| Antennary fucosylation ( <b>AF</b> )                           | GP27+GP33+GP35+GP39                                                                              |
| <b>IgG</b>                                                     |                                                                                                  |
| Agalactosylation ( <b>G0</b> )                                 | IGP1+IGP2+IGP3+IGP4+IGP6                                                                         |
| Monogalactosylation ( <b>G1</b> )                              | IGP7+IGP8+IGP9+IGP10+IGP11                                                                       |
| Digalactosylation ( <b>G2</b> )                                | IGP12+IGP13+IGP14+IGP15                                                                          |
| Sialylation ( <b>S</b> )                                       | IGP16+IGP17+IGP18+IGP19+IGP20+IGP21+IGP22+IGP23+IGP24                                            |
| Bisecting GlcNAc ( <b>B</b> )                                  | IGP3+IGP6+IGP10+IGP11+IGP13+IGP15+IGP19+IGP22+IGP24                                              |
| Core fucosylation ( <b>CF</b> )                                | IGP1+IGP4+IGP6+IGP8+IGP9+IGP10+IGP11+IGP14+IGP15+IGP16+IGP18+IGP19+IGP23+IGP24                   |

**Table S2.** Differences in total plasma protein N-glycans between controls and AF patients corrected for age and sex. Significant associations are given in bold.

| Glycan trait | b-coefficient (95% confidence interval)* | P-value       | Adjusted p-value <sup>#</sup> |
|--------------|------------------------------------------|---------------|-------------------------------|
| GP01         | -0.105 (-0.248, 0.037)                   | 0.1465        | 0.379                         |
| GP02         | -0.094 (-0.163, -0.024)                  | 0.0083        | 0.095                         |
| GP03         | -0.145 (-0.273, -0.017)                  | 0.0265        | 0.252                         |
| GP04         | -0.055 (-0.177, 0.067)                   | 0.3784        | 0.674                         |
| GP05         | 0.001 (-0.145, 0.146)                    | 0.9925        | 0.993                         |
| GP06         | -0.12 (-0.205, -0.035)                   | 0.0057        | 0.081                         |
| GP07         | -0.016 (-0.072, 0.04)                    | 0.5771        | 0.82                          |
| GP08         | -0.005 (-0.048, 0.039)                   | 0.8363        | 0.941                         |
| GP09         | -0.022 (-0.097, 0.053)                   | 0.5597        | 0.82                          |
| GP10         | 0.009 (-0.083, 0.102)                    | 0.8422        | 0.941                         |
| GP11         | -0.036 (-0.124, 0.052)                   | 0.4179        | 0.722                         |
| GP12         | -0.005 (-0.051, 0.041)                   | 0.8351        | 0.941                         |
| GP13         | 0.021 (-0.08, 0.122)                     | 0.6823        | 0.884                         |
| GP14         | 0.009 (-0.027, 0.045)                    | 0.6128        | 0.832                         |
| GP15         | 0.001 (-0.064, 0.066)                    | 0.9819        | 0.993                         |
| GP16         | 0.038 (-0.013, 0.09)                     | 0.1457        | 0.379                         |
| GP17         | -0.001 (-0.094, 0.092)                   | 0.9815        | 0.993                         |
| GP18         | 0.018 (-0.04, 0.076)                     | 0.5416        | 0.82                          |
| <b>GP19</b>  | <b>0.075 (0.036, 0.114)</b>              | <b>0.0002</b> | <b>0.004</b>                  |
| GP20         | -0.004 (-0.044, 0.035)                   | 0.8265        | 0.941                         |
| GP21         | -0.008 (-0.052, 0.035)                   | 0.7088        | 0.898                         |
| GP22         | 0.046 (-0.015, 0.107)                    | 0.136         | 0.379                         |
| GP23         | 0.043 (-0.048, 0.135)                    | 0.352         | 0.669                         |
| GP24         | 0.021 (-0.056, 0.097)                    | 0.5896        | 0.82                          |
| GP25         | -0.003 (-0.055, 0.049)                   | 0.8981        | 0.984                         |
| GP26         | -0.031 (-0.088, 0.026)                   | 0.2863        | 0.583                         |
| GP27         | -0.102 (-0.209, 0.005)                   | 0.0616        | 0.322                         |
| GP28         | 0.039 (-0.047, 0.125)                    | 0.3712        | 0.674                         |
| GP29         | 0.077 (-0.002, 0.155)                    | 0.0567        | 0.322                         |
| GP30         | 0.021 (-0.054, 0.096)                    | 0.5731        | 0.82                          |
| GP31         | 0.001 (-0.087, 0.089)                    | 0.9816        | 0.993                         |
| GP32         | -0.067 (-0.141, 0.006)                   | 0.0734        | 0.322                         |
| GP33         | -0.08 (-0.185, 0.026)                    | 0.1391        | 0.379                         |
| GP34         | -0.041 (-0.104, 0.021)                   | 0.1937        | 0.46                          |
| GP35         | -0.092 (-0.193, 0.008)                   | 0.072         | 0.322                         |
| GP36         | -0.044 (-0.1, 0.011)                     | 0.1192        | 0.379                         |
| GP37         | 0.013 (-0.075, 0.1)                      | 0.7727        | 0.937                         |
| GP38         | -0.021 (-0.081, 0.039)                   | 0.4911        | 0.8                           |
| GP39         | -0.103 (-0.201, -0.004)                  | 0.0413        | 0.322                         |
| LB           | 0.006 (-0.004, 0.016)                    | 0.2152        | 0.486                         |

|           |                        |        |       |
|-----------|------------------------|--------|-------|
| HB        | -0.03 (-0.074, 0.014)  | 0.1766 | 0.438 |
| G0        | -0.099 (-0.223, 0.024) | 0.113  | 0.379 |
| G1        | -0.042 (-0.152, 0.068) | 0.4551 | 0.763 |
| G2        | 0.016 (-0.001, 0.033)  | 0.0723 | 0.322 |
| G3        | -0.028 (-0.074, 0.017) | 0.2215 | 0.486 |
| G4        | -0.047 (-0.106, 0.012) | 0.1182 | 0.379 |
| S0        | -0.046 (-0.139, 0.046) | 0.3261 | 0.641 |
| S1        | 0.021 (0, 0.042)       | 0.0482 | 0.322 |
| S2        | 0.005 (-0.027, 0.036)  | 0.7711 | 0.937 |
| S3        | -0.028 (-0.074, 0.018) | 0.2337 | 0.493 |
| S4        | -0.047 (-0.11, 0.015)  | 0.1376 | 0.379 |
| Bisecting | -0.018 (-0.079, 0.043) | 0.5622 | 0.82  |
| OligoMann | -0.008 (-0.042, 0.025) | 0.6344 | 0.841 |
| CoreFuc   | -0.002 (-0.061, 0.058) | 0.9515 | 0.993 |
| AnteFuc   | -0.088 (-0.189, 0.013) | 0.0881 | 0.359 |

\*b-coefficient represents the natural logarithm of the relative change in N-glycan traits between groups corrected for age and sex differences.

# p-value was adjusted using the Li-Ji correction method

**Table S3.** Differences in IgG N-glycans between controls and AF patients corrected for age and sex. Significant associations are given in bold.

| Glycan trait     | b-coefficient (95% confidence interval)* | P-value                  | Adjusted p-value <sup>#</sup> |
|------------------|------------------------------------------|--------------------------|-------------------------------|
| IGP01            | -0.007 (-0.108, 0.094)                   | 0.8877                   | 0.917                         |
| IGP02            | -0.132 (-0.303, 0.039)                   | 0.1294                   | 0.313                         |
| IGP03            | 0.01 (-0.056, 0.076)                     | 0.7689                   | 0.824                         |
| IGP04            | -0.039 (-0.105, 0.027)                   | 0.2445                   | 0.426                         |
| <b>IGP05</b>     | <b>0.123 (0.042, 0.204)</b>              | <b>0.003</b>             | <b>0.021</b>                  |
| <b>IGP06</b>     | <b>-0.093 (-0.167, -0.019)</b>           | <b>0.0134</b>            | <b>0.05</b>                   |
| IGP07            | -0.094 (-0.233, 0.045)                   | 0.1833                   | 0.351                         |
| IGP08            | 0.009 (-0.017, 0.034)                    | 0.4948                   | 0.66                          |
| <b>IGP09</b>     | <b>0.065 (0.02, 0.109)</b>               | <b>0.0048</b>            | <b>0.028</b>                  |
| <b>IGP10</b>     | <b>-0.083 (-0.143, -0.024)</b>           | <b>0.0062</b>            | <b>0.03</b>                   |
| IGP11            | -0.029 (-0.087, 0.029)                   | 0.322                    | 0.495                         |
| IGP12            | -0.1 (-0.245, 0.046)                     | 0.1774                   | 0.351                         |
| IGP13            | 0.009 (-0.054, 0.072)                    | 0.7715                   | 0.824                         |
| IGP14            | 0.051 (-0.018, 0.119)                    | 0.1447                   | 0.315                         |
| IGP15            | -0.02 (-0.079, 0.04)                     | 0.52                     | 0.66                          |
| IGP16            | 0.029 (-0.021, 0.08)                     | 0.2498                   | 0.426                         |
| IGP17            | 0.049 (-0.015, 0.114)                    | 0.1337                   | 0.313                         |
| IGP18            | 0.021 (-0.046, 0.089)                    | 0.5338                   | 0.66                          |
| IGP19            | 0.001 (-0.072, 0.074)                    | 0.976                    | 0.976                         |
| <b>IGP20</b>     | <b>0.221 (0.149, 0.294)</b>              | <b>8x10<sup>-9</sup></b> | <b>1x10<sup>-7</sup></b>      |
| <b>IGP21</b>     | <b>0.166 (0.095, 0.237)</b>              | <b>6x10<sup>-6</sup></b> | <b>6x10<sup>-5</sup></b>      |
| IGP22            | -0.031 (-0.129, 0.066)                   | 0.5289                   | 0.66                          |
| IGP23            | 0.098 (0.004, 0.192)                     | 0.0418                   | 0.14                          |
| IGP24            | 0.014 (-0.061, 0.088)                    | 0.7174                   | 0.822                         |
| G0               | -0.05 (-0.111, 0.01)                     | 0.1003                   | 0.303                         |
| G1               | 0.009 (-0.01, 0.027)                     | 0.3543                   | 0.52                          |
| G2               | 0.035 (-0.029, 0.098)                    | 0.2854                   | 0.462                         |
| S                | 0.036 (-0.011, 0.083)                    | 0.1275                   | 0.313                         |
| <b>Bisecting</b> | <b>-0.055 (-0.096, -0.014)</b>           | <b>0.0083</b>            | <b>0.035</b>                  |
| CoreFuc          | -0.001 (-0.006, 0.003)                   | 0.5689                   | 0.677                         |

\*b-coefficient represents the natural logarithm of the relative change in N-glycan traits between groups corrected for age and sex differences.

<sup>#</sup> p-value was adjusted using the Li-Ji correction method

**Table S4.** Associations of total plasma protein N-glycans with the recurrence of AF after catheter ablation. Model 1 is corrected for age and sex, while model 2 is corrected for age, sex, diabetes, and hypertension. Significant associations are given in bold.

| Glycan trait | b-coefficient (95% confidence interval)* - model 1 | P-value       | Adjusted p-value <sup>#</sup> | b-coefficient (95% confidence interval)* - model 2 | P-value       | Adjusted p-value <sup>#</sup> |
|--------------|----------------------------------------------------|---------------|-------------------------------|----------------------------------------------------|---------------|-------------------------------|
| GP01         | 0.117 (-0.049, 0.284)                              | 0.165         | 0.495                         | 0.117 (-0.049, 0.282)                              | 0.1661        | 0.39                          |
| <b>GP02</b>  | <b>0.117 (0.038, 0.196)</b>                        | <b>0.0041</b> | <b>0.041</b>                  | <b>0.115 (0.036, 0.194)</b>                        | <b>0.0047</b> | <b>0.039</b>                  |
| GP03         | 0.174 (0.028, 0.32)                                | 0.0198        | 0.113                         | 0.174 (0.03, 0.318)                                | 0.018         | 0.093                         |
| GP04         | 0.086 (-0.06, 0.232)                               | 0.2465        | 0.509                         | 0.096 (-0.047, 0.239)                              | 0.1872        | 0.39                          |
| GP05         | 0.094 (-0.079, 0.266)                              | 0.2862        | 0.51                          | 0.104 (-0.066, 0.273)                              | 0.2282        | 0.438                         |
| GP06         | 0.131 (0.033, 0.228)                               | 0.0091        | 0.065                         | 0.135 (0.039, 0.232)                               | 0.0065        | 0.046                         |
| <b>GP07</b>  | <b>0.094 (0.028, 0.159)</b>                        | <b>0.0053</b> | <b>0.043</b>                  | <b>0.096 (0.031, 0.162)</b>                        | <b>0.0039</b> | <b>0.037</b>                  |
| GP08         | 0.054 (0.005, 0.104)                               | 0.0328        | 0.156                         | 0.056 (0.005, 0.106)                               | 0.03          | 0.142                         |
| <b>GP09</b>  | <b>0.123 (0.039, 0.207)</b>                        | <b>0.0043</b> | <b>0.041</b>                  | <b>0.127 (0.044, 0.21)</b>                         | <b>0.003</b>  | <b>0.035</b>                  |
| GP10         | 0.045 (-0.064, 0.154)                              | 0.421         | 0.614                         | 0.057 (-0.048, 0.161)                              | 0.2882        | 0.456                         |
| GP11         | 0.098 (-0.004, 0.201)                              | 0.0602        | 0.264                         | 0.106 (0.005, 0.207)                               | 0.0403        | 0.177                         |
| GP12         | 0.042 (-0.007, 0.091)                              | 0.0915        | 0.373                         | 0.041 (-0.008, 0.09)                               | 0.0996        | 0.379                         |
| GP13         | 0.073 (-0.046, 0.191)                              | 0.2272        | 0.509                         | 0.079 (-0.039, 0.197)                              | 0.1855        | 0.39                          |
| GP14         | 0.017 (-0.026, 0.06)                               | 0.4306        | 0.614                         | 0.017 (-0.026, 0.06)                               | 0.4357        | 0.608                         |
| <b>GP15</b>  | <b>0.12 (0.046, 0.195)</b>                         | <b>0.0017</b> | <b>0.025</b>                  | <b>0.121 (0.047, 0.196)</b>                        | <b>0.0016</b> | <b>0.023</b>                  |
| GP16         | 0.024 (-0.036, 0.085)                              | 0.4263        | 0.614                         | 0.03 (-0.03, 0.09)                                 | 0.3298        | 0.495                         |
| GP17         | 0.088 (-0.019, 0.195)                              | 0.1077        | 0.403                         | 0.094 (-0.014, 0.201)                              | 0.0866        | 0.353                         |
| GP18         | -0.029 (-0.096, 0.038)                             | 0.393         | 0.614                         | -0.026 (-0.093, 0.041)                             | 0.4465        | 0.608                         |
| GP19         | 0.024 (-0.02, 0.068)                               | 0.2774        | 0.51                          | 0.025 (-0.019, 0.069)                              | 0.2682        | 0.456                         |
| GP20         | -0.032 (-0.08, 0.016)                              | 0.1894        | 0.501                         | -0.035 (-0.082, 0.012)                             | 0.1453        | 0.39                          |
| GP21         | -0.013 (-0.063, 0.037)                             | 0.6181        | 0.705                         | -0.014 (-0.064, 0.036)                             | 0.5854        | 0.668                         |
| GP22         | -0.041 (-0.113, 0.03)                              | 0.2548        | 0.509                         | -0.043 (-0.114, 0.029)                             | 0.2384        | 0.438                         |
| GP23         | 0.061 (-0.044, 0.166)                              | 0.2536        | 0.509                         | 0.061 (-0.045, 0.167)                              | 0.2574        | 0.456                         |
| GP24         | 0.025 (-0.058, 0.108)                              | 0.5463        | 0.677                         | 0.023 (-0.06, 0.107)                               | 0.5821        | 0.668                         |
| GP25         | -0.017 (-0.076, 0.043)                             | 0.5755        | 0.677                         | -0.021 (-0.08, 0.038)                              | 0.4858        | 0.629                         |
| GP26         | 0.002 (-0.062, 0.065)                              | 0.9579        | 0.958                         | -0.006 (-0.068, 0.055)                             | 0.8397        | 0.855                         |
| GP27         | -0.04 (-0.16, 0.08)                                | 0.5105        | 0.677                         | -0.04 (-0.161, 0.081)                              | 0.5144        | 0.645                         |
| GP28         | -0.003 (-0.096, 0.089)                             | 0.941         | 0.958                         | -0.007 (-0.1, 0.086)                               | 0.8843        | 0.884                         |
| GP29         | -0.068 (-0.153, 0.016)                             | 0.113         | 0.403                         | -0.068 (-0.153, 0.018)                             | 0.1185        | 0.389                         |
| GP30         | -0.013 (-0.094, 0.069)                             | 0.7579        | 0.785                         | -0.017 (-0.099, 0.064)                             | 0.6753        | 0.7                           |
| GP31         | -0.04 (-0.135, 0.055)                              | 0.405         | 0.614                         | -0.049 (-0.142, 0.045)                             | 0.3041        | 0.469                         |

|                 |                            |               |              |                            |               |              |
|-----------------|----------------------------|---------------|--------------|----------------------------|---------------|--------------|
| GP32            | -0.019 (-0.101, 0.063)     | 0.6464        | 0.722        | -0.032 (-0.109, 0.046)     | 0.422         | 0.608        |
| GP33            | -0.043 (-0.161, 0.074)     | 0.4676        | 0.635        | -0.045 (-0.163, 0.074)     | 0.4586        | 0.608        |
| GP34            | -0.036 (-0.104, 0.032)     | 0.2963        | 0.512        | -0.045 (-0.11, 0.02)       | 0.1726        | 0.39         |
| GP35            | -0.063 (-0.174, 0.048)     | 0.2653        | 0.509        | -0.067 (-0.179, 0.044)     | 0.2325        | 0.438        |
| GP36            | 0.017 (-0.044, 0.079)      | 0.5796        | 0.677        | 0.014 (-0.048, 0.075)      | 0.6665        | 0.7          |
| GP37            | -0.027 (-0.118, 0.065)     | 0.568         | 0.677        | -0.025 (-0.116, 0.066)     | 0.5861        | 0.668        |
| GP38            | -0.013 (-0.078, 0.052)     | 0.6957        | 0.734        | -0.014 (-0.079, 0.05)      | 0.6623        | 0.7          |
| GP39            | -0.022 (-0.131, 0.087)     | 0.6923        | 0.734        | -0.023 (-0.133, 0.086)     | 0.6743        | 0.7          |
| LB              | 0.006 (-0.004, 0.017)      | 0.2103        | 0.509        | 0.007 (-0.003, 0.017)      | 0.1559        | 0.39         |
| HB              | -0.023 (-0.072, 0.026)     | 0.3627        | 0.608        | -0.027 (-0.076, 0.022)     | 0.276         | 0.456        |
| G0              | 0.113 (-0.031, 0.256)      | 0.1224        | 0.41         | 0.112 (-0.031, 0.254)      | 0.1241        | 0.389        |
| G1              | 0.091 (-0.041, 0.222)      | 0.1744        | 0.497        | 0.099 (-0.029, 0.228)      | 0.1297        | 0.389        |
| G2              | -0.006 (-0.025, 0.014)     | 0.5816        | 0.677        | -0.006 (-0.025, 0.014)     | 0.5732        | 0.668        |
| G3              | -0.023 (-0.074, 0.029)     | 0.3833        | 0.614        | -0.027 (-0.078, 0.023)     | 0.2882        | 0.456        |
| G4              | -0.014 (-0.078, 0.051)     | 0.6811        | 0.734        | -0.015 (-0.08, 0.05)       | 0.6512        | 0.7          |
| S0              | 0.079 (-0.031, 0.189)      | 0.1566        | 0.495        | 0.085 (-0.023, 0.193)      | 0.1227        | 0.389        |
| S1              | 0.027 (0.004, 0.051)       | 0.023         | 0.119        | 0.029 (0.006, 0.053)       | 0.0149        | 0.085        |
| S2              | -0.025 (-0.062, 0.013)     | 0.1932        | 0.501        | -0.027 (-0.064, 0.01)      | 0.1475        | 0.39         |
| S3              | -0.029 (-0.081, 0.023)     | 0.2681        | 0.509        | -0.034 (-0.085, 0.017)     | 0.191         | 0.39         |
| S4              | -0.022 (-0.091, 0.047)     | 0.5345        | 0.677        | -0.022 (-0.091, 0.046)     | 0.5204        | 0.645        |
| Bisecting       | 0.09 (0.02, 0.159)         | 0.0114        | 0.073        | 0.092 (0.023, 0.162)       | 0.0096        | 0.061        |
| <b>OligoMan</b> |                            |               |              |                            |               |              |
| <b>n</b>        | <b>0.069 (0.03, 0.107)</b> | <b>0.0006</b> | <b>0.012</b> | <b>0.069 (0.03, 0.108)</b> | <b>0.0006</b> | <b>0.011</b> |
| CoreFuc         | 0.042 (-0.028, 0.112)      | 0.235         | 0.509        | 0.046 (-0.023, 0.116)      | 0.1918        | 0.39         |
| AnteFuc         | -0.042 (-0.154, 0.07)      | 0.46          | 0.635        | -0.043 (-0.156, 0.07)      | 0.4494        | 0.608        |

\*b-coefficient represents the natural logarithm of the relative change in N-glycan traits between groups corrected for age and sex differences.

# p-value was adjusted using the Li-Ji correction method

**Table S5.** Differences in IgG N-glycans between pre- and post-catheter ablation corrected for age and sex. Significant associations are given in bold.

| Glycan trait | b-coefficient (95% confidence interval)* | P-value                  | Adjusted p-value <sup>#</sup> |
|--------------|------------------------------------------|--------------------------|-------------------------------|
| IGP01        | -0.017 (-0.101, 0.067)                   | 0.6881                   | 0.979                         |
| IGP02        | -0.008 (-0.172, 0.156)                   | 0.9237                   | 0.979                         |
| IGP03        | -0.036 (-0.093, 0.021)                   | 0.213                    | 0.717                         |
| IGP04        | 0.004 (-0.05, 0.058)                     | 0.8751                   | 0.979                         |
| <b>IGP05</b> | <b>-0.108 (-0.166, -0.05)</b>            | <b>0.0003</b>            | <b>0.002</b>                  |
| IGP06        | 0.01 (-0.056, 0.075)                     | 0.7726                   | 0.979                         |
| IGP07        | -0.013 (-0.15, 0.124)                    | 0.8557                   | 0.979                         |
| IGP08        | 0.006 (-0.016, 0.028)                    | 0.5796                   | 0.979                         |
| IGP09        | -0.005 (-0.043, 0.033)                   | 0.7949                   | 0.979                         |
| IGP10        | 0.013 (-0.041, 0.067)                    | 0.6262                   | 0.979                         |
| IGP11        | -0.016 (-0.068, 0.036)                   | 0.5358                   | 0.979                         |
| IGP12        | -0.014 (-0.153, 0.124)                   | 0.8362                   | 0.979                         |
| IGP13        | -0.006 (-0.06, 0.048)                    | 0.8324                   | 0.979                         |
| IGP14        | 0.001 (-0.058, 0.06)                     | 0.9681                   | 0.979                         |
| IGP15        | -0.01 (-0.061, 0.04)                     | 0.6823                   | 0.979                         |
| IGP16        | -0.003 (-0.045, 0.038)                   | 0.8693                   | 0.979                         |
| <b>IGP17</b> | <b>-0.086 (-0.143, -0.029)</b>           | <b>0.0031</b>            | <b>0.018</b>                  |
| IGP18        | -0.001 (-0.062, 0.059)                   | 0.9642                   | 0.979                         |
| IGP19        | -0.029 (-0.088, 0.03)                    | 0.3319                   | 0.913                         |
| <b>IGP20</b> | <b>-0.19 (-0.249, -0.13)</b>             | <b>2x10<sup>-9</sup></b> | <b>2x10<sup>-8</sup></b>      |
| <b>IGP21</b> | <b>-0.172 (-0.227, -0.118)</b>           | <b>2x10<sup>-9</sup></b> | <b>2x10<sup>-8</sup></b>      |
| IGP22        | -0.075 (-0.165, 0.015)                   | 0.1024                   | 0.501                         |
| IGP23        | -0.025 (-0.11, 0.06)                     | 0.5657                   | 0.979                         |
| IGP24        | -0.037 (-0.096, 0.023)                   | 0.2235                   | 0.717                         |
| G0           | 0.005 (-0.044, 0.053)                    | 0.851                    | 0.979                         |
| G1           | 0.004 (-0.011, 0.018)                    | 0.632                    | 0.979                         |
| G2           | -0.001 (-0.056, 0.055)                   | 0.9795                   | 0.979                         |
| S            | -0.024 (-0.064, 0.016)                   | 0.2378                   | 0.717                         |
| Bisecting    | -0.001 (-0.039, 0.037)                   | 0.9694                   | 0.979                         |
| CoreFuc      | 0.003 (-0.002, 0.008)                    | 0.1893                   | 0.717                         |

\*b-coefficient represents the natural logarithm of the relative change in N-glycan traits between groups corrected for age and sex differences.

<sup>#</sup> p-value was adjusted using the Li-Ji correction method



**Table S6.** Associations of IgG N-glycans with the CHA<sub>2</sub>DS<sub>2</sub>-VASc score corrected for age and sex. Significant associations are given in bold.

| Glycan trait     | Linear b-coefficient (95% confidence interval) | P-value                  | Adjusted p-value <sup>#</sup> |
|------------------|------------------------------------------------|--------------------------|-------------------------------|
| IGP01            | -0.022 (-0.235, 0.191)                         | 0.8382                   | 0.696                         |
| IGP02            | 0.254 (-0.101, 0.61)                           | 0.1597                   | 0.17                          |
| IGP03            | 0.036 (-0.098, 0.17)                           | 0.5959                   | 0.696                         |
| <b>IGP04</b>     | <b>0.179 (0.04, 0.319)</b>                     | <b>0.0118</b>            | <b>0.044</b>                  |
| IGP05            | -0.095 (-0.263, 0.074)                         | 0.2678                   | 0.243                         |
| <b>IGP06</b>     | <b>0.355 (0.201, 0.508)</b>                    | <b>1x10<sup>-5</sup></b> | <b>1x10<sup>-4</sup></b>      |
| IGP07            | 0.044 (-0.254, 0.342)                          | 0.7715                   | 0.797                         |
| <b>IGP08</b>     | <b>-0.067 (-0.119, -0.015)</b>                 | <b>0.0123</b>            | <b>0.034</b>                  |
| IGP09            | -0.079 (-0.17, 0.012)                          | 0.0873                   | 0.168                         |
| IGP10            | 0.141 (0.019, 0.263)                           | 0.0242                   | 0.062                         |
| IGP11            | 0.102 (-0.019, 0.222)                          | 0.0976                   | 0.174                         |
| IGP12            | -0.055 (-0.369, 0.26)                          | 0.7325                   | 0.783                         |
| IGP13            | -0.041 (-0.174, 0.091)                         | 0.5377                   | 0.617                         |
| <b>IGP14</b>     | <b>-0.213 (-0.352, -0.074)</b>                 | <b>0.0028</b>            | <b>0.014</b>                  |
| IGP15            | -0.052 (-0.177, 0.072)                         | 0.4073                   | 0.504                         |
| IGP16            | -0.047 (-0.155, 0.062)                         | 0.396                    | 0.504                         |
| IGP17            | -0.076 (-0.216, 0.065)                         | 0.2879                   | 0.387                         |
| <b>IGP18</b>     | <b>-0.186 (-0.323, -0.048)</b>                 | <b>0.0086</b>            | <b>0.029</b>                  |
| IGP19            | -0.136 (-0.286, 0.013)                         | 0.0735                   | 0.161                         |
| IGP20            | -0.171 (-0.326, -0.017)                        | 0.0302                   | 0.071                         |
| IGP21            | -0.121 (-0.277, 0.035)                         | 0.1262                   | 0.205                         |
| IGP22            | -0.126 (-0.327, 0.076)                         | 0.2195                   | 0.323                         |
| <b>IGP23</b>     | <b>-0.275 (-0.475, -0.076)</b>                 | <b>0.007</b>             | <b>0.027</b>                  |
| IGP24            | -0.129 (-0.275, 0.018)                         | 0.0852                   | 0.168                         |
| <b>G0</b>        | <b>0.214 (0.087, 0.341)</b>                    | <b>0.0011</b>            | <b>0.011</b>                  |
| G1               | -0.031 (-0.069, 0.006)                         | 0.1016                   | 0.174                         |
| <b>G2</b>        | <b>-0.184 (-0.315, -0.053)</b>                 | <b>0.006</b>             | <b>0.026</b>                  |
| <b>S</b>         | <b>-0.152 (-0.248, -0.055)</b>                 | <b>0.0023</b>            | <b>0.013</b>                  |
| <b>Bisecting</b> | <b>0.132 (0.049, 0.215)</b>                    | <b>0.0019</b>            | <b>0.013</b>                  |
| CoreFuc          | 0.004 (-0.006, 0.014)                          | 0.4579                   | 0.545                         |

<sup>#</sup> p-value was adjusted using the Li-Ji correction method

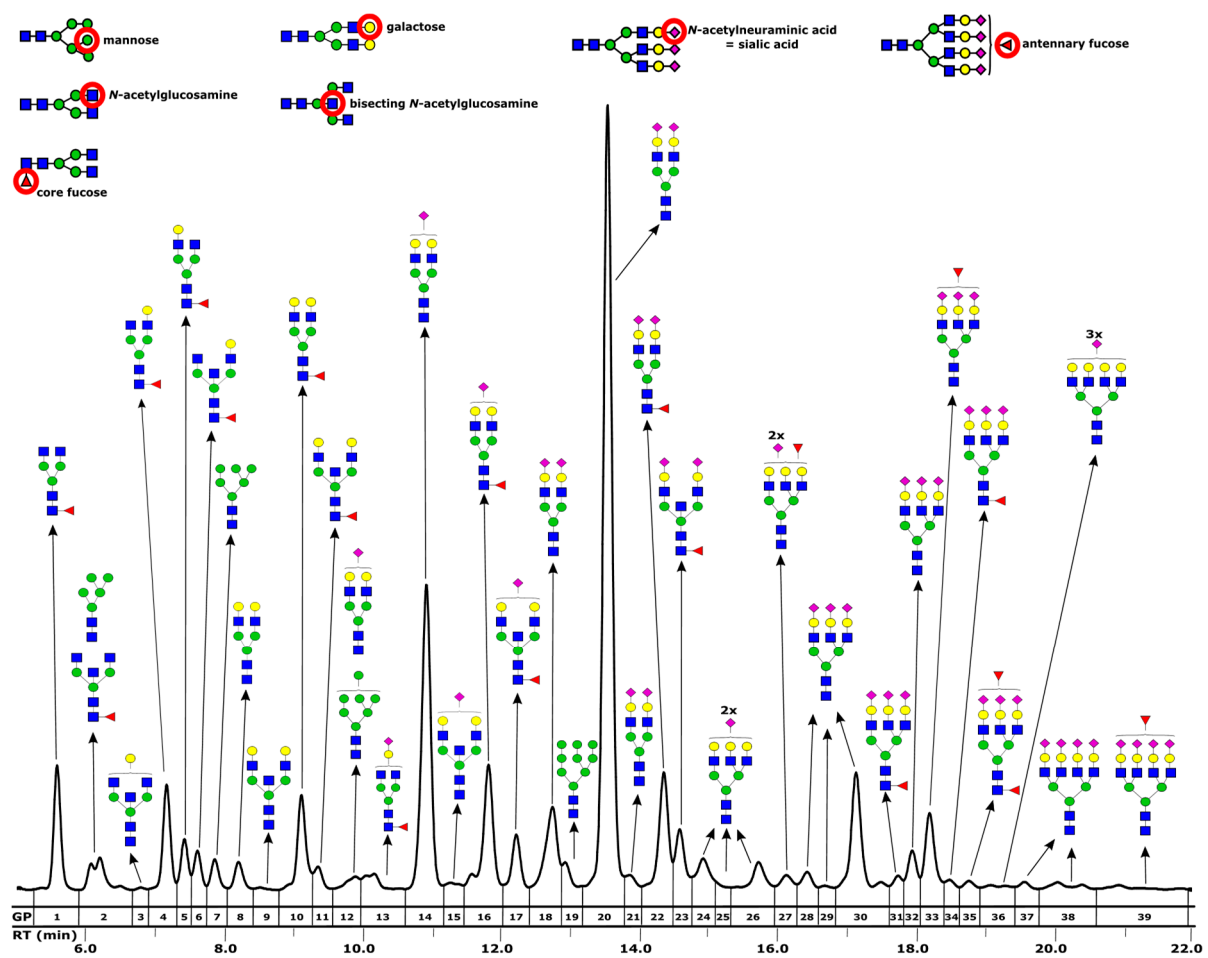

**Figure S1.** Representative chromatogram of 2-AB labeled total plasma protein N-glycans. Dominant structures in each peak are shown above.

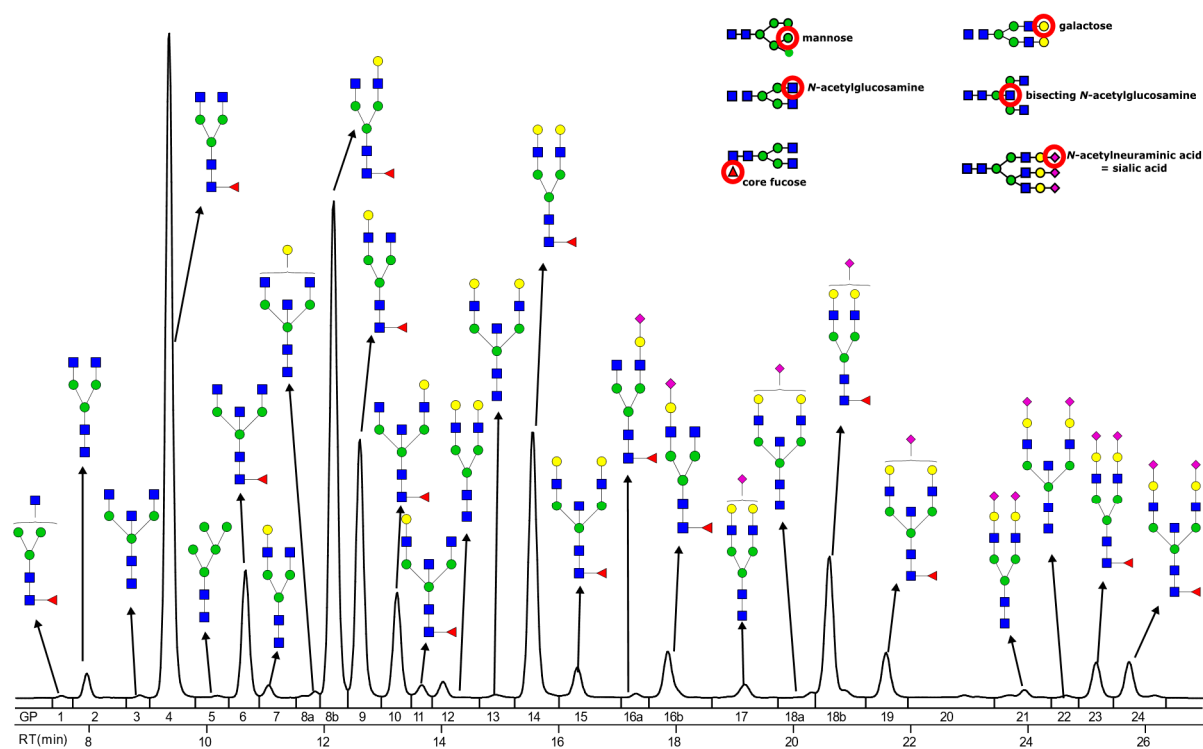

**Figure S2.** Representative IgG chromatogram with dominant structures in each peak shown.

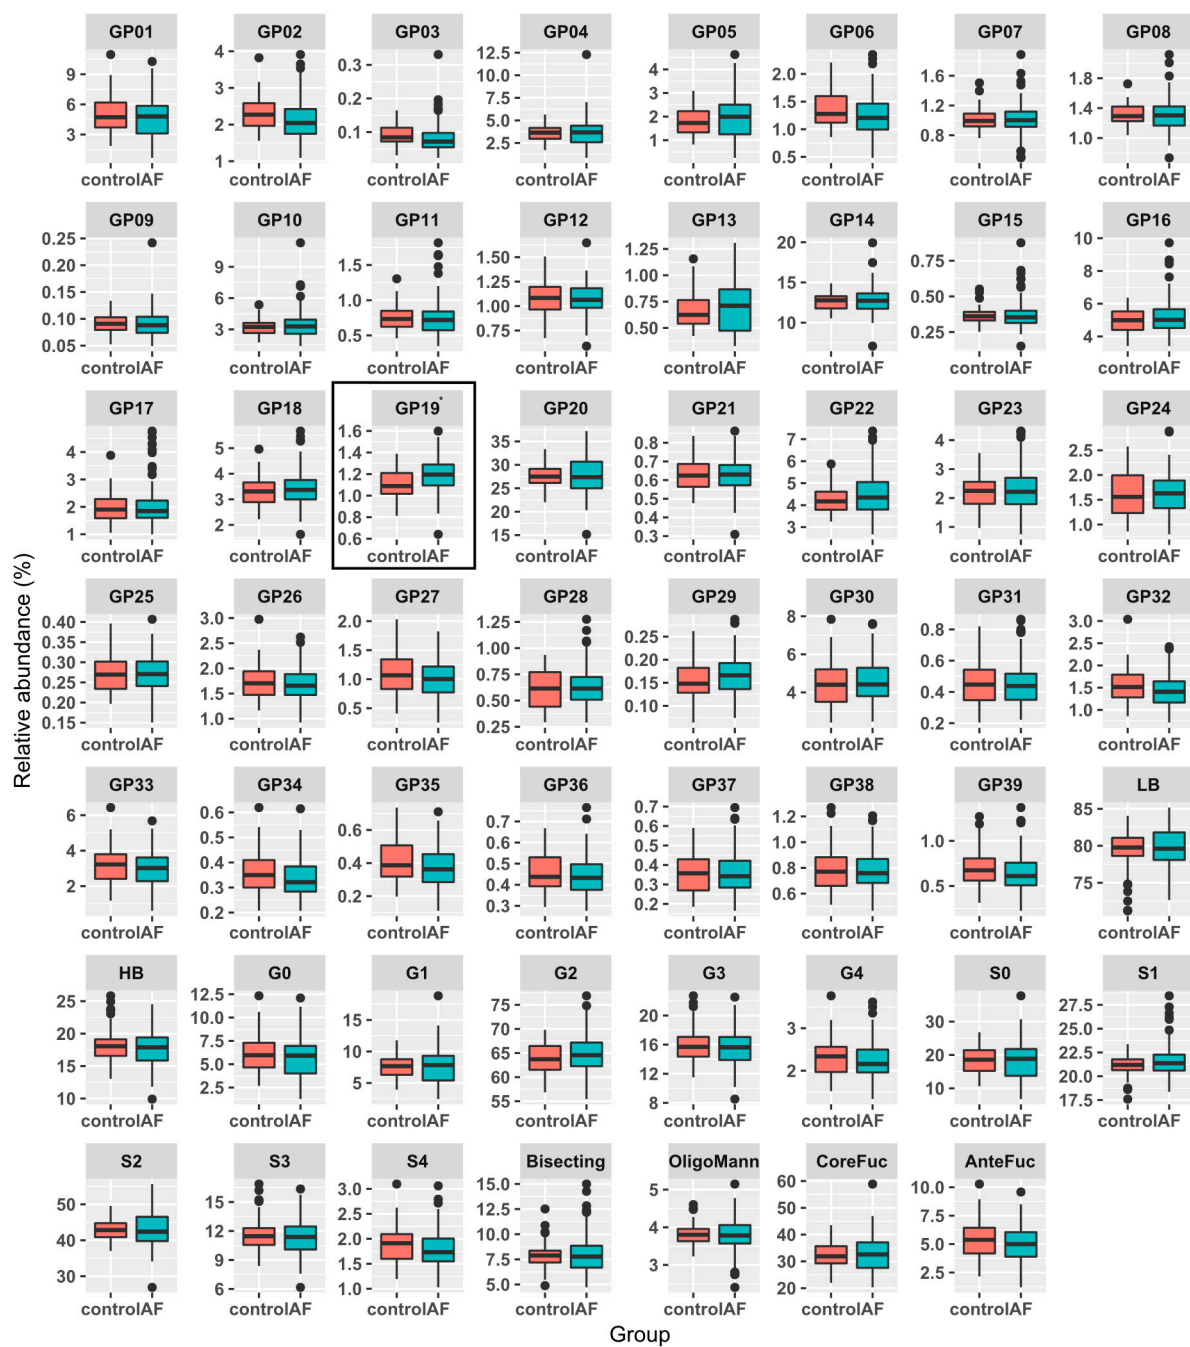

**Figure S3.** Distribution of total plasma protein N-glycans in AF and control groups. Statistically significant changes in structures are denoted by a box around the plot of the corresponding peak.

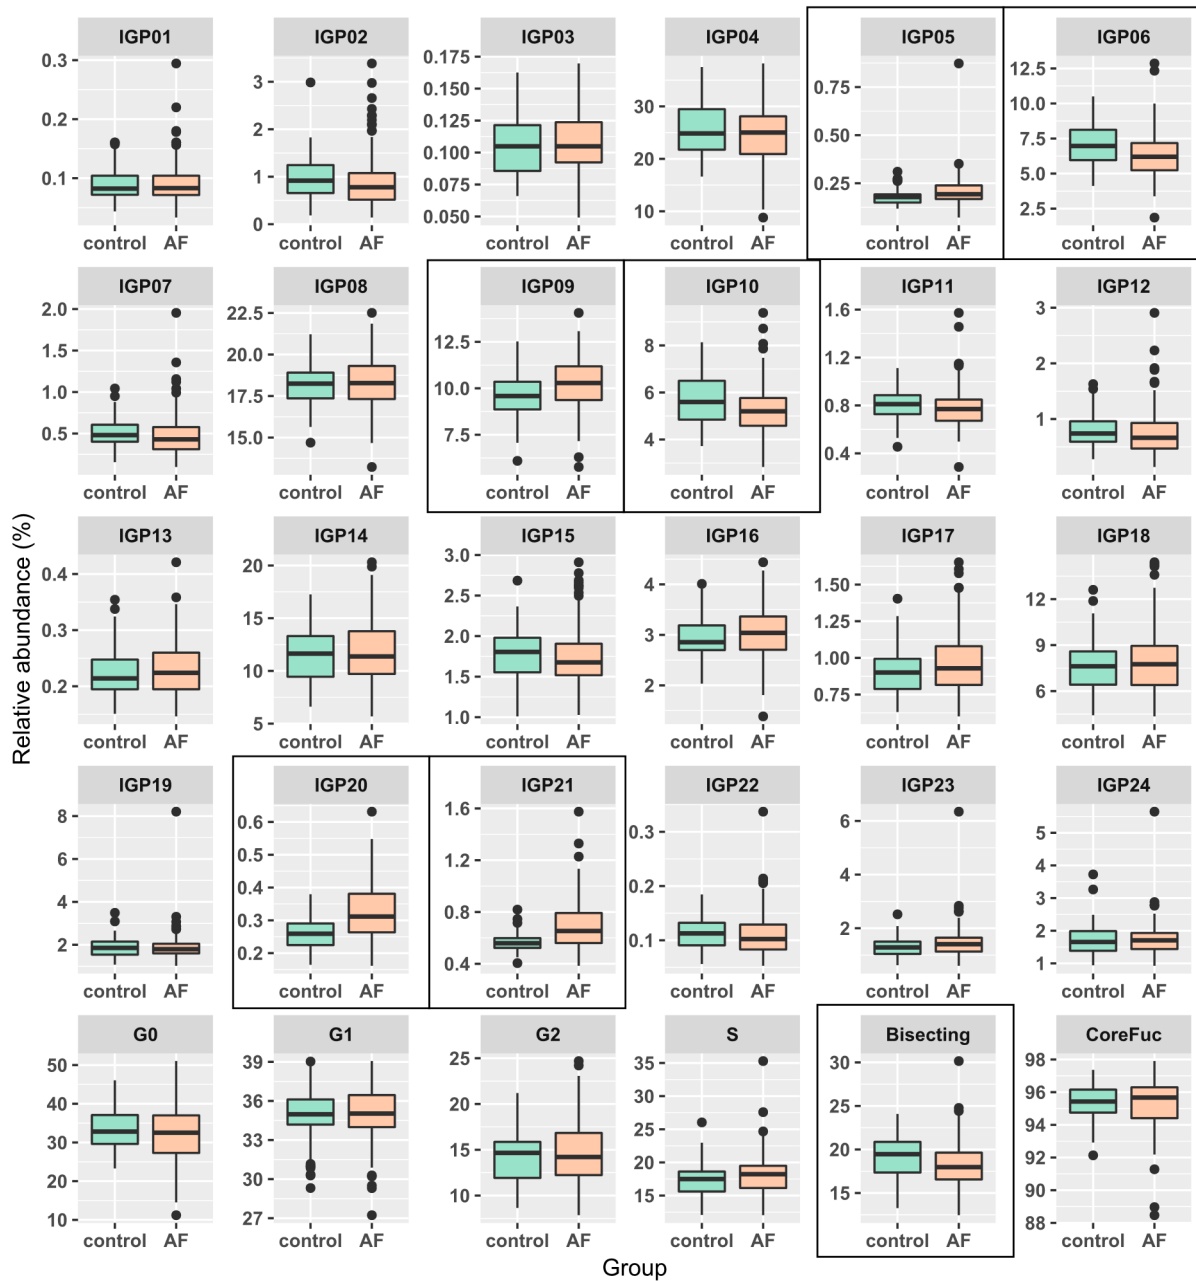

**Figure S4.** Distribution of IgG N-glycans in AF and control group for all measured IgG N-glycan peaks and derived traits. Structures and traits that are significantly different after adjusting for age and sex are denoted by a box around the corresponding plot.
